# Supplementary material
Source: PubMed Central journal article supplement (PMC3537321)
Supplement: Supp_Fig1.pdf [file Supp_Fig1.pdf]

## Supplementary Data

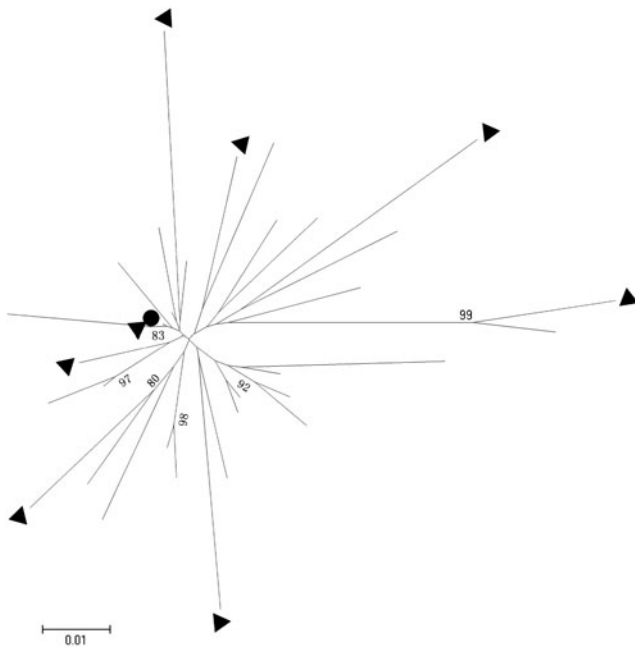

**SUPPLEMENTARY FIG. S1.** The neighbor-joining tree was constructed using an *env* c2v3 set. A dot represents predicted consensus sequences; a triangle represents chosen strains with full-length genomic sequences.
